# Supplementary material for: Osteogenic Stimulation of Human Adipose‐Derived Mesenchymal Stem Cells Using a Fungal Metabolite That Suppresses the Polycomb Group Protein EZH2
Source: PubMed Central journal article supplement — Stem Cells Transl Med. 2017 Dec 27;7(2):197–209. doi: 10.1002/sctm.17-0086 (PMC5788881; doi:10.1002/sctm.17-0086), 2017-12-27

**Supplementary Figure 2:** RNA-sequencing data showing RPKM values for bone-related genes RUNX2, alkaline phosphatase (ALPL), integrin binding sialoprotein (IBSP), collagen 2 (COL2A1), melanoma cell adhesion molecule (MCAM)/CD146, and decorin (DCN) in adipose MSCs treated with or without CytoD for 24 hours. Statistical analysis was performed by paired t-tests and the P-values are indicated for each graph.

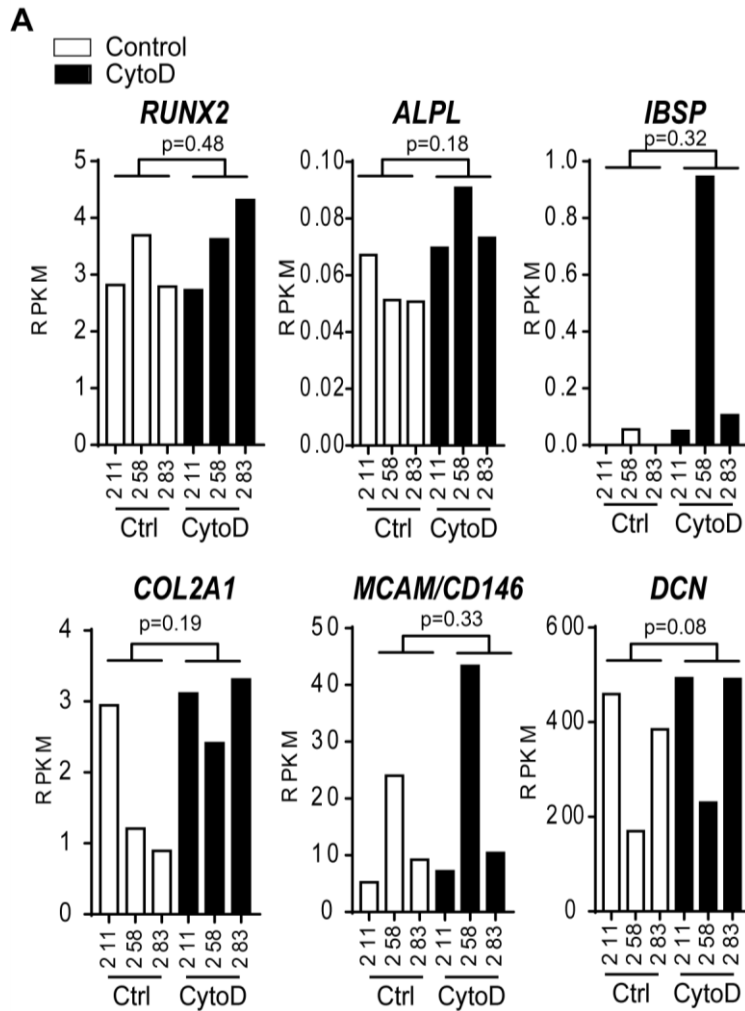

Supplement: SCT3-7-197-s002.pdf [file SCT3-7-197-s002.pdf]
