# Supplementary material for: Osteogenic Stimulation of Human Adipose‐Derived Mesenchymal Stem Cells Using a Fungal Metabolite That Suppresses the Polycomb Group Protein EZH2
Source: PubMed Central journal article supplement — Stem Cells Transl Med. 2017 Dec 27;7(2):197–209. doi: 10.1002/sctm.17-0086 (PMC5788881; doi:10.1002/sctm.17-0086), 2017-12-27
Supplement: SCT3-7-197-s003.pdf [file SCT3-7-197-s003.pdf]

**Supplementary Figure 3: A.** RNA-sequencing data showing RPKM values for epithelial, myogenic, and hepatic lineages. Statistical analysis was performed by paired t-tests; n.s. indicates no significance differences,  $P > 0.05$ . **B.** Table summarizing the genes, gene symbols, and RPKM values for the different lineage-specific genes analyzed.

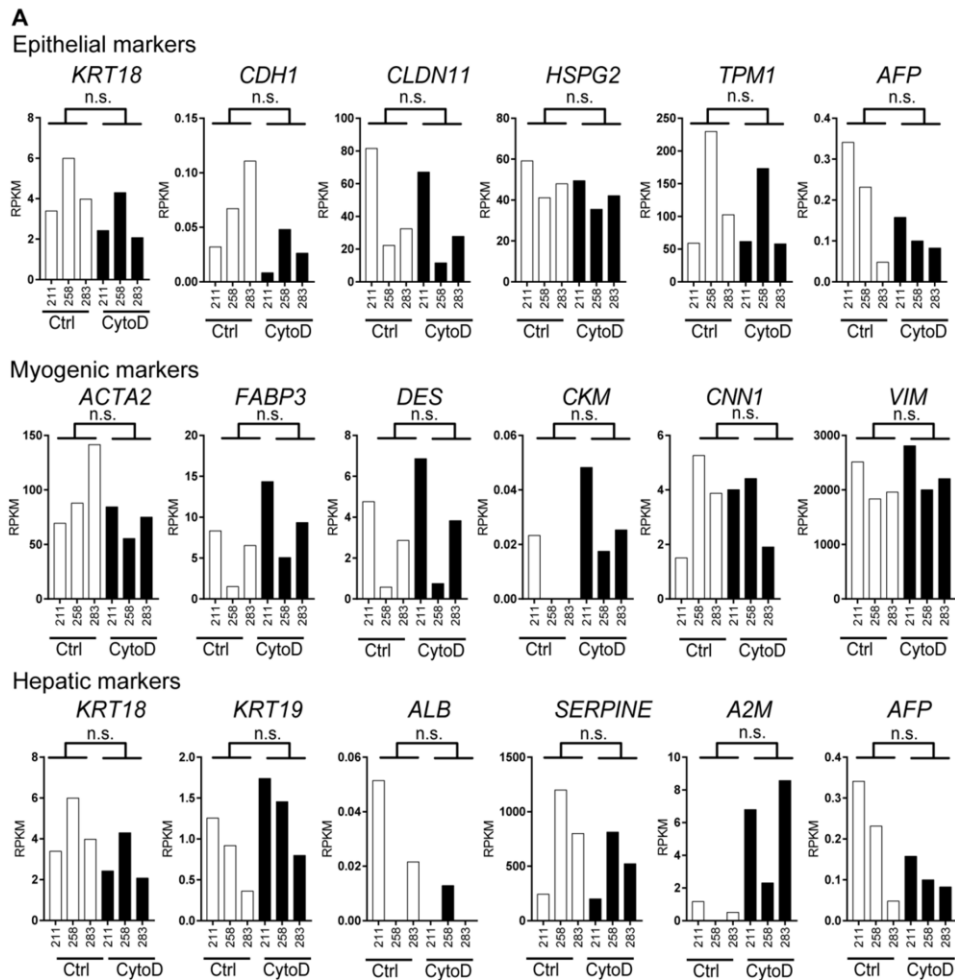

**B**

| Tissue-specific markers   |          | RPKM values |       |       |        |       |       |
|---------------------------|----------|-------------|-------|-------|--------|-------|-------|
| Gene symbol               | Gene     | MSC         |       |       | MSC    |       |       |
|                           |          | 211         | 258   | 283   | 211    | 258   | 283   |
|                           |          | Ctrl        | Ctrl  | Ctrl  | CytoD  | CytoD | CytoD |
| <b>Epithelial markers</b> |          |             |       |       |        |       |       |
| Cytokeratin 18            | KRT18    | 3.387       | 5.994 | 3.976 | 2.422  | 4.298 | 2.078 |
| E-cadherin                | CDH1     | 0.032       | 0.067 | 0.111 | 0.0083 | 0.048 | 0.026 |
| Claudin 11                | CLDN11   | 81.53       | 22.28 | 32.43 | 67.129 | 11.52 | 27.8  |
| Perlecan                  | HSPG2    | 59.15       | 41.1  | 47.94 | 49.443 | 35.47 | 42.07 |
| Tropomyosin 1             | TPM1     | 59.11       | 229.8 | 102.5 | 61.485 | 173.1 | 57.99 |
| AFP                       | AFP      | 0.341       | 0.231 | 0.048 | 0.1574 | 0.1   | 0.083 |
| <b>Muscle markers</b>     |          |             |       |       |        |       |       |
| MyoD                      | MYOD1    | 0.000       | 0.000 | 0.000 | 0.000  | 0.000 | 0.000 |
| Myogenin                  | MYOG     | 0.000       | 0.000 | 0.000 | 0.000  | 0.000 | 0.000 |
| VE cadherin               | CDH5     | 0.000       | 0.000 | 0.000 | 0.0097 | 0.000 | 0.000 |
| GDF-8/Myostatin           | MSTN     | 0.000       | 0.000 | 0.000 | 0.000  | 0.000 | 0.045 |
| Troponin 1 (cardiac)      | TNNI3    | 0.000       | 0.000 | 0.000 | 0.000  | 0.000 | 0.000 |
| Alpha SMA                 | ACTA2    | 69.42       | 87.89 | 141.6 | 84.443 | 55.46 | 75.04 |
| FABP3                     | FABP3    | 8.319       | 1.501 | 6.535 | 14.358 | 5.064 | 9.334 |
| Desmin                    | DES      | 4.762       | 0.575 | 2.866 | 6.8641 | 0.759 | 3.827 |
| Creatin kinase            | CKM      | 0.023       | 0.000 | 0.000 | 0.0483 | 0.017 | 0.025 |
| Calponin                  | CNN1     | 1.505       | 5.264 | 3.879 | 4.0076 | 4.415 | 1.905 |
| Vimentin                  | VIM      | 2514        | 1834  | 1958  | 2810.7 | 2002  | 2205  |
| <b>Hepatic markers</b>    |          |             |       |       |        |       |       |
| α-fetoprotein             | AFP      | 0.341       | 0.231 | 0.048 | 0.1574 | 0.1   | 0.083 |
| Cytokeratin 18            | KRT18    | 3.387       | 5.994 | 3.976 | 2.422  | 4.298 | 2.078 |
| Cytokeratin 19            | KRT19    | 1.257       | 0.919 | 0.362 | 1.7392 | 1.456 | 0.799 |
| Albumin                   | ALB      | 0.051       | 0.000 | 0.022 | 0.000  | 0.013 | 0.000 |
| PAI-1                     | SERPINE1 | 243.6       | 1200  | 800.8 | 200.71 | 813.6 | 522.1 |
| A2M                       | A2M      | 1.167       | 0.025 | 0.51  | 6.7957 | 2.313 | 8.568 |
